# Supplementary material for: Efficacy of X-Ray Phytosanitary Irradiation on the Infectivity and Reproduction of Angiostrongylus cantonensis in Experimentally Infected Rats
Source: PubMed Central journal article supplement (PMC10993834; doi:10.4269/ajtmh.23-0570), 2024-02-20
Supplement: tpmd230570.SD1.pdf [file tpmd230570.SD1.pdf]

**Supplemental Table 1**

Mean initial and final weights (g) of rats per treatment at the three- and six-week necropsy. The effect of treatment on weight gain was not significant at 3 weeks ( $P = 0.31$ ) or 6 weeks ( $P = 0.75$ )

| Treatment | Age at necropsy | <i>n</i> | Sex | Mean weight (g) |       | Weight change (g) |
|-----------|-----------------|----------|-----|-----------------|-------|-------------------|
|           |                 |          |     | Initial         | Final |                   |
| Water     | 3 weeks         | 4        | F   | 168.0           | 243.5 | 75.5              |
|           |                 | 3        | M   | 238.3           | 378.7 | 140.3             |
| 0 Gy L3   | 3 weeks         | 4        | F   | 173.5           | 235.5 | 62.0              |
|           |                 | 3        | M   | 243.7           | 380.0 | 136.3             |
| 150 Gy L3 | 3 weeks         | 4        | F   | 174.5           | 244.0 | 69.5              |
|           |                 | 3        | M   | 252.3           | 402.3 | 150.0             |
| 400 Gy L3 | 3 weeks         | 4        | F   | 170.3           | 233.8 | 63.5              |
|           |                 | 3        | M   | 242.3           | 377.7 | 135.3             |
| Water     | 6 weeks         | 3        | F   | 153.3           | 240.0 | 86.7              |
|           |                 | 4        | M   | 247.0           | 457.5 | 210.5             |
| 0 Gy L3   | 6 weeks         | 3        | F   | 167.0           | 235.3 | 68.3              |
|           |                 | 4        | M   | 234.0           | 448.3 | 214.3             |
| 150 Gy L3 | 6 weeks         | 3        | F   | 164.3           | 247.0 | 82.7              |
|           |                 | 4        | M   | 249.5           | 469.8 | 220.3             |
| 400 Gy L3 | 6 weeks         | 3        | F   | 166.3           | 251.3 | 85.0              |
|           |                 | 4        | M   | 266.0           | 479.8 | 213.8             |
